# Supplementary material for: Helicobacter pylori-induced aberrant demethylation and expression of GNB4 promotes gastric carcinogenesis via the Hippo–YAP1 pathway
Source: Springer Nature journal article supplement (doi:10.1186/s12916-023-02842-6), 2023-04-05

# WB original image

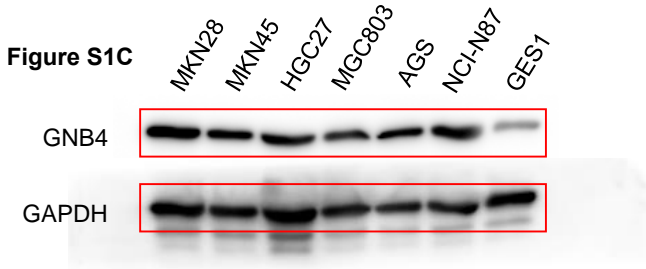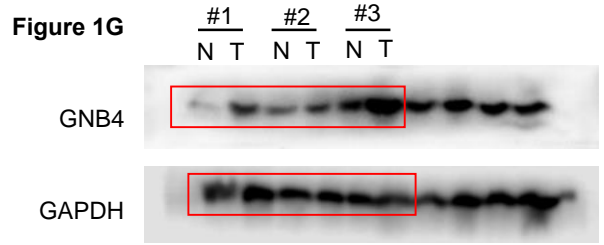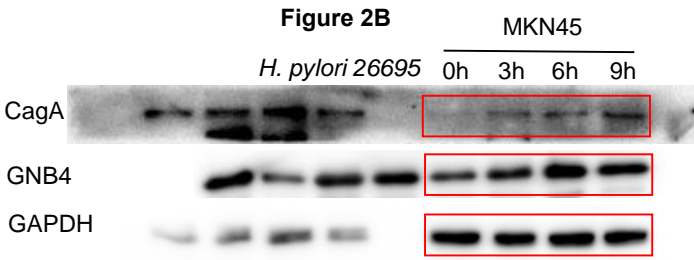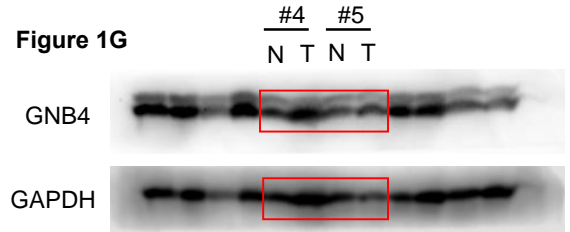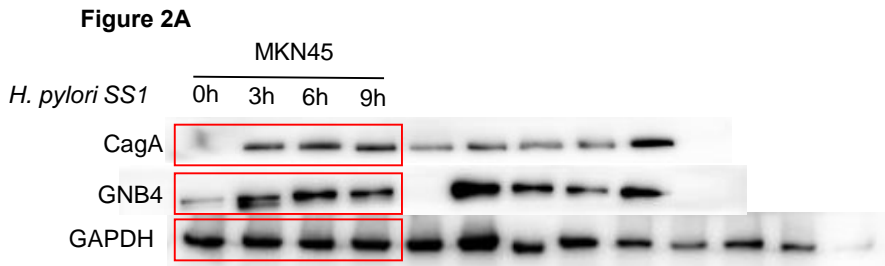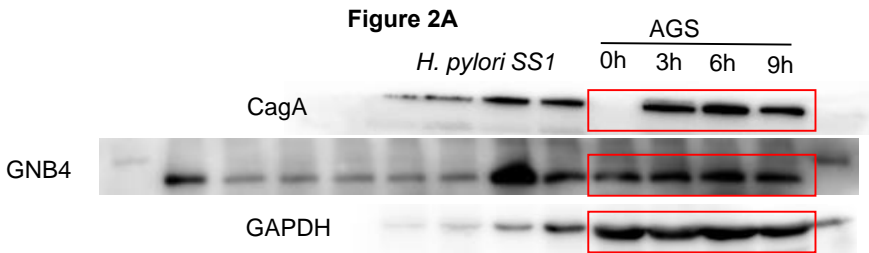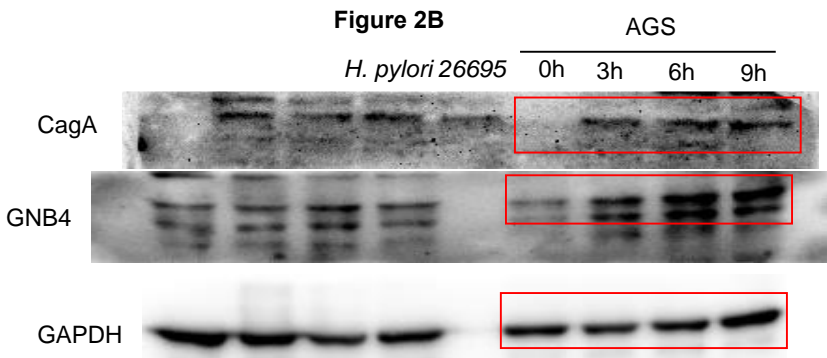

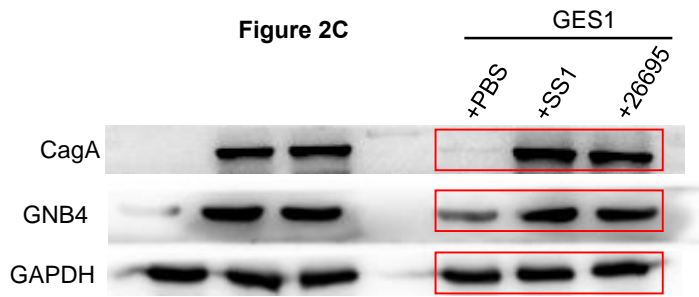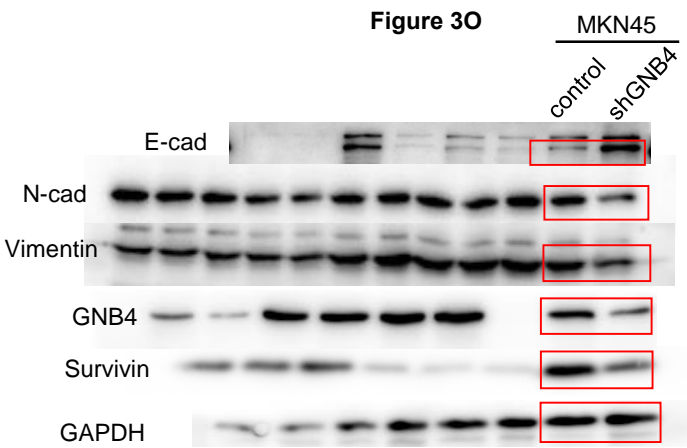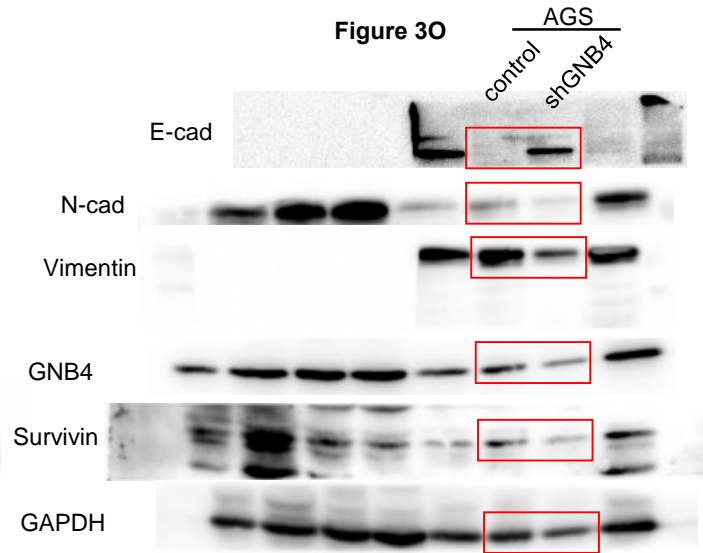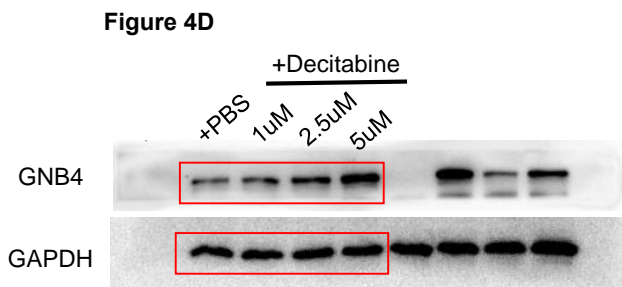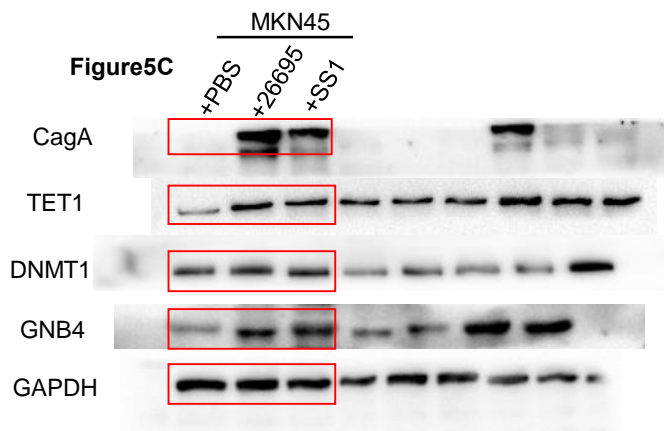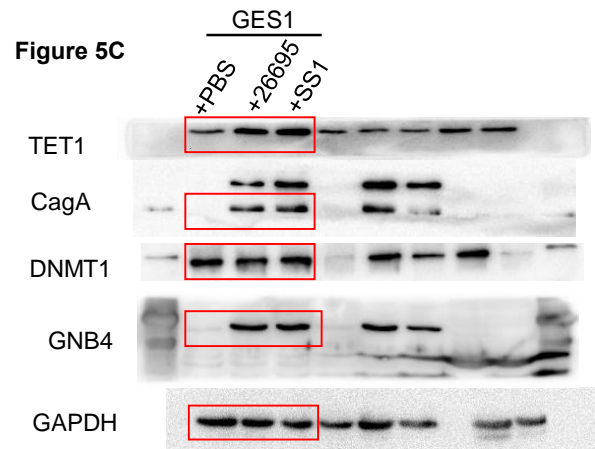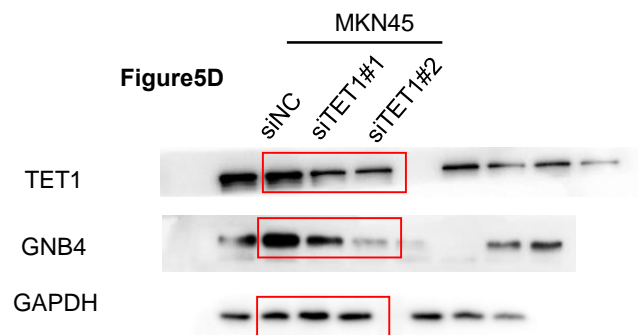

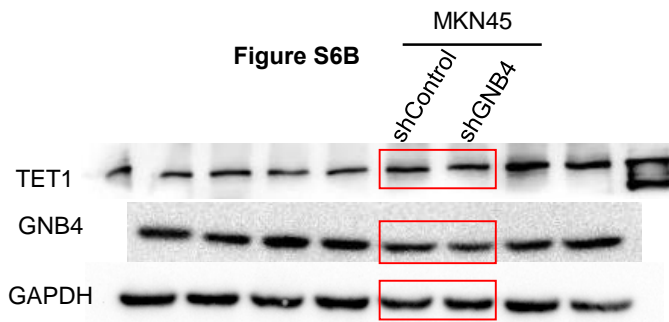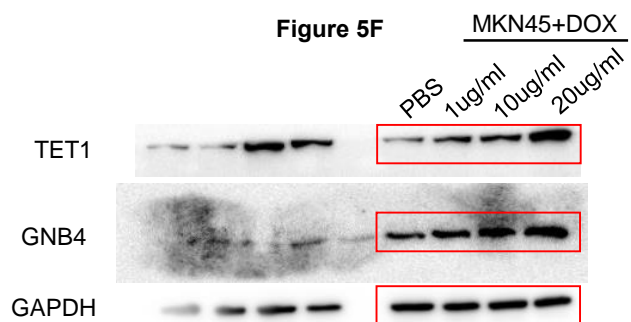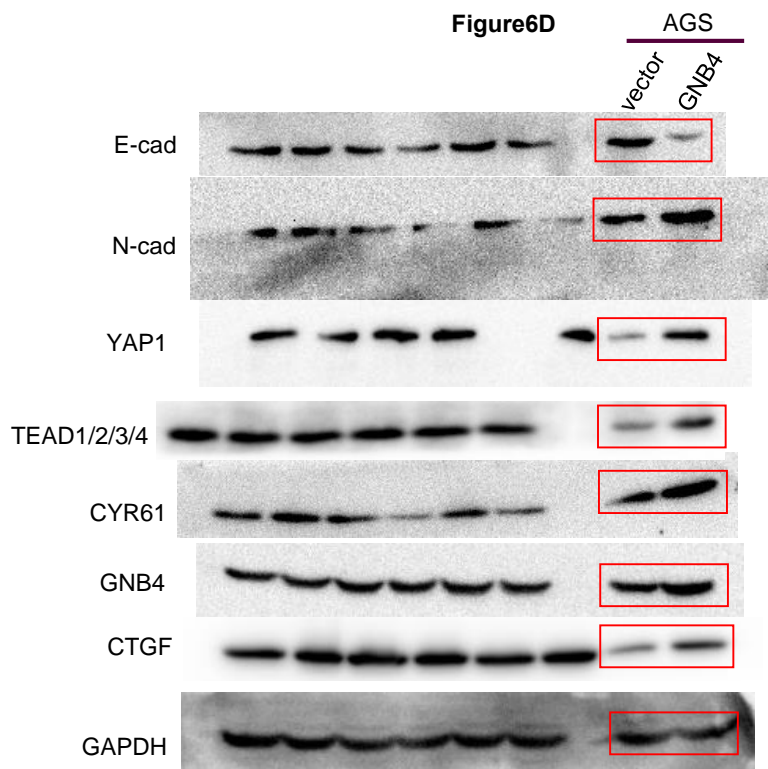

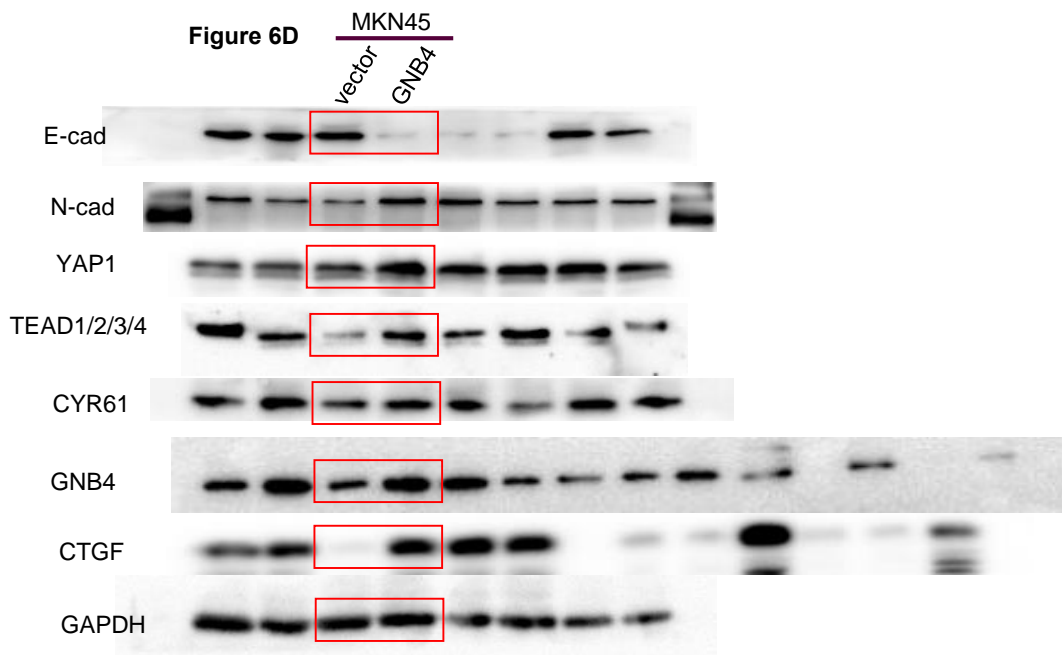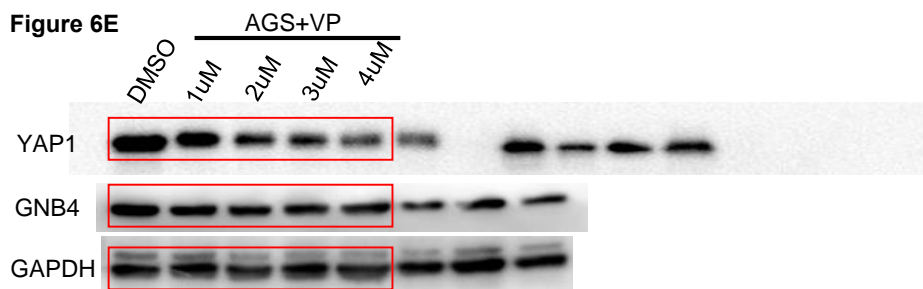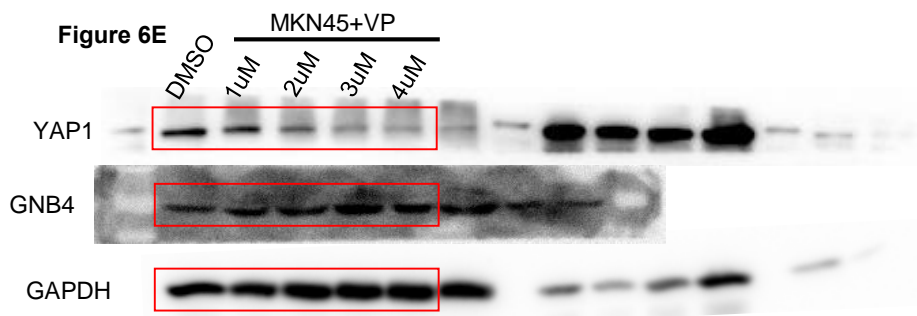

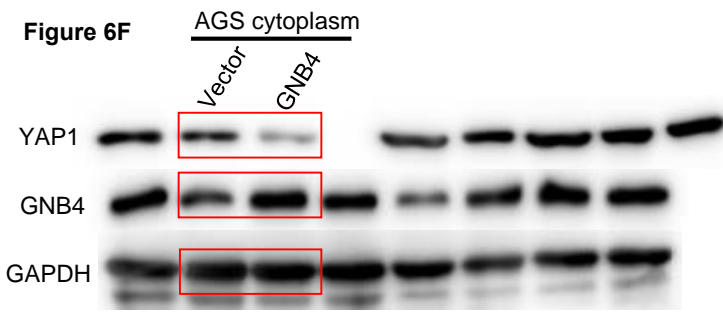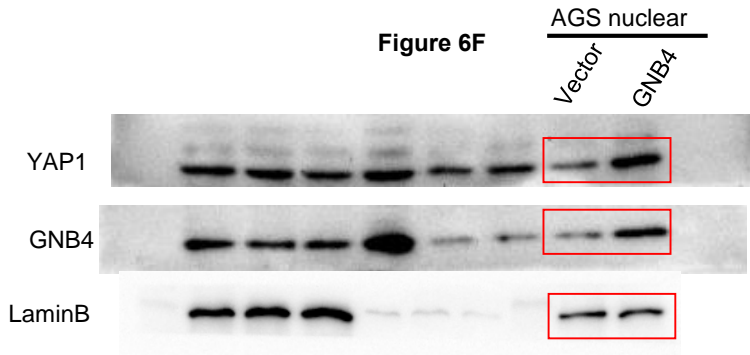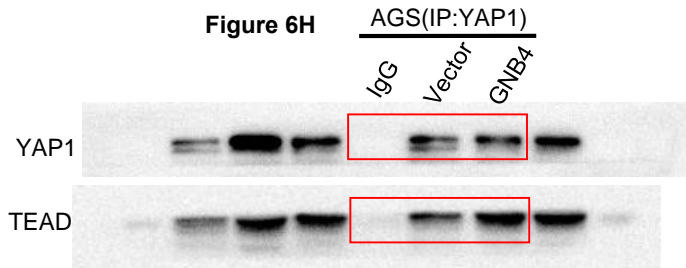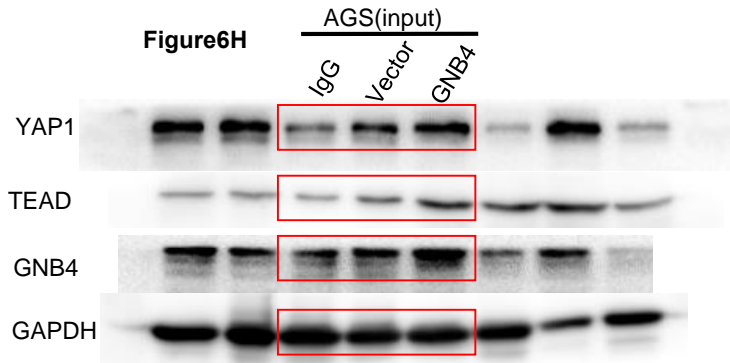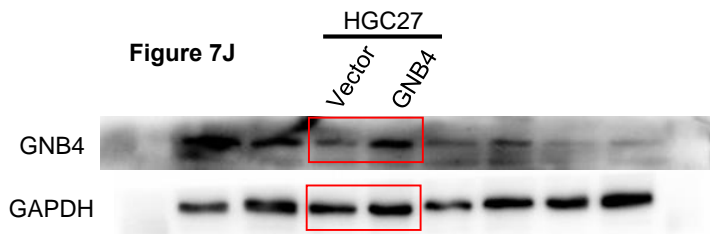

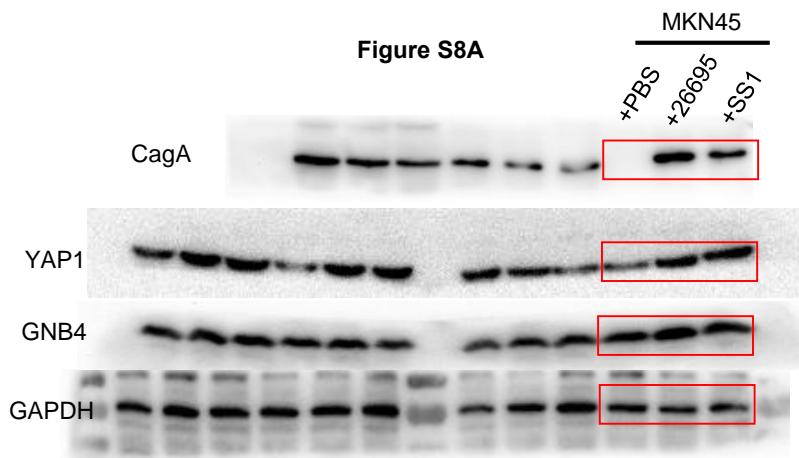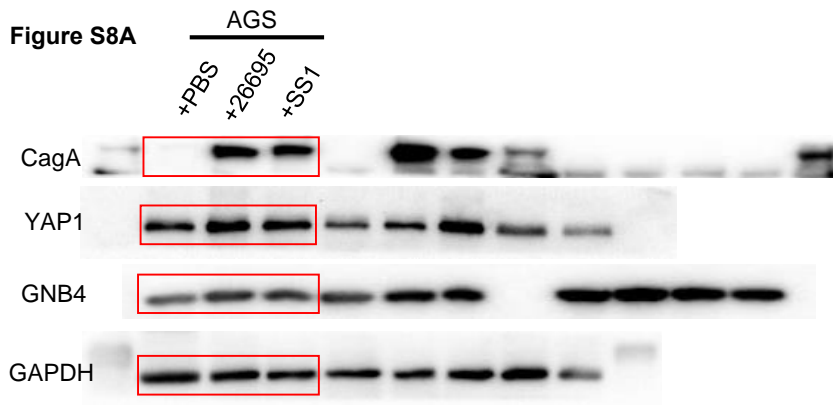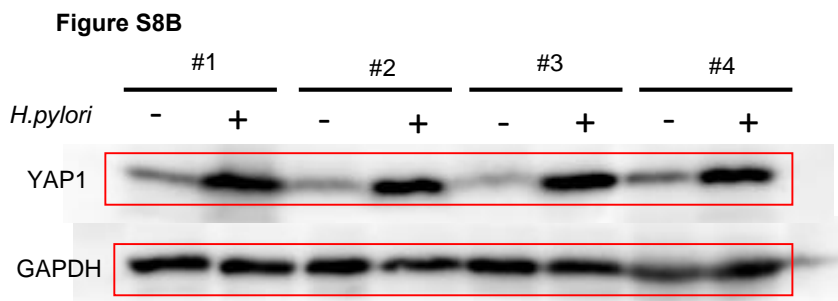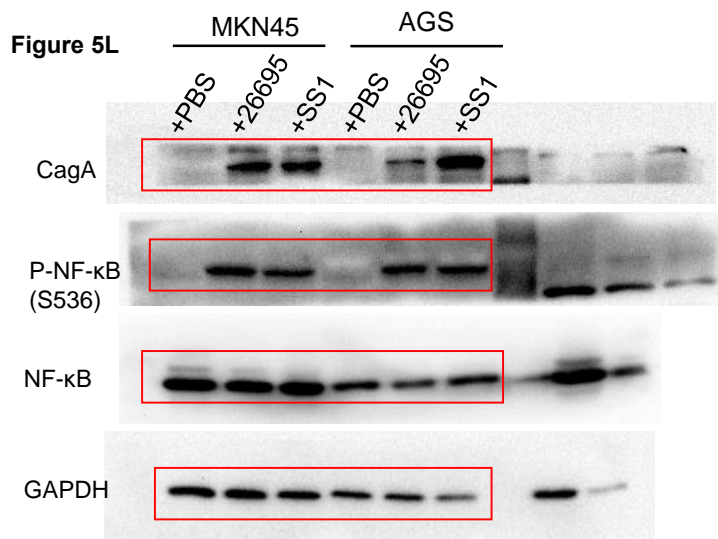

Figure 5M MKN45

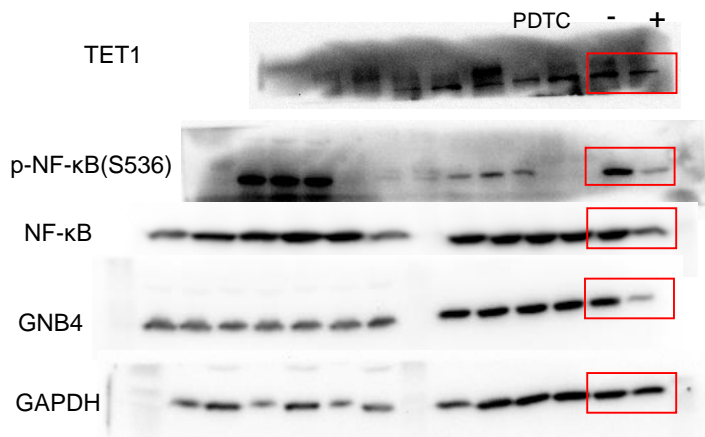

Figure 5M AGS

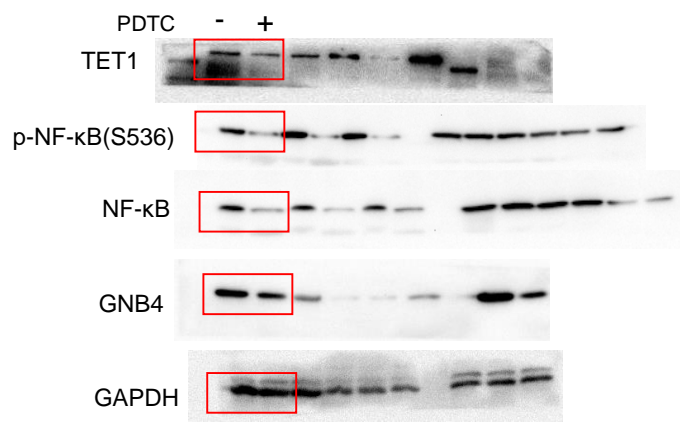

Supplement: MOESM10 [file 25211996]
