# Supplementary material for: Helicobacter pylori-induced aberrant demethylation and expression of GNB4 promotes gastric carcinogenesis via the Hippo–YAP1 pathway
Source: Springer Nature journal article supplement (doi:10.1186/s12916-023-02842-6), 2023-04-05

Figure 4C

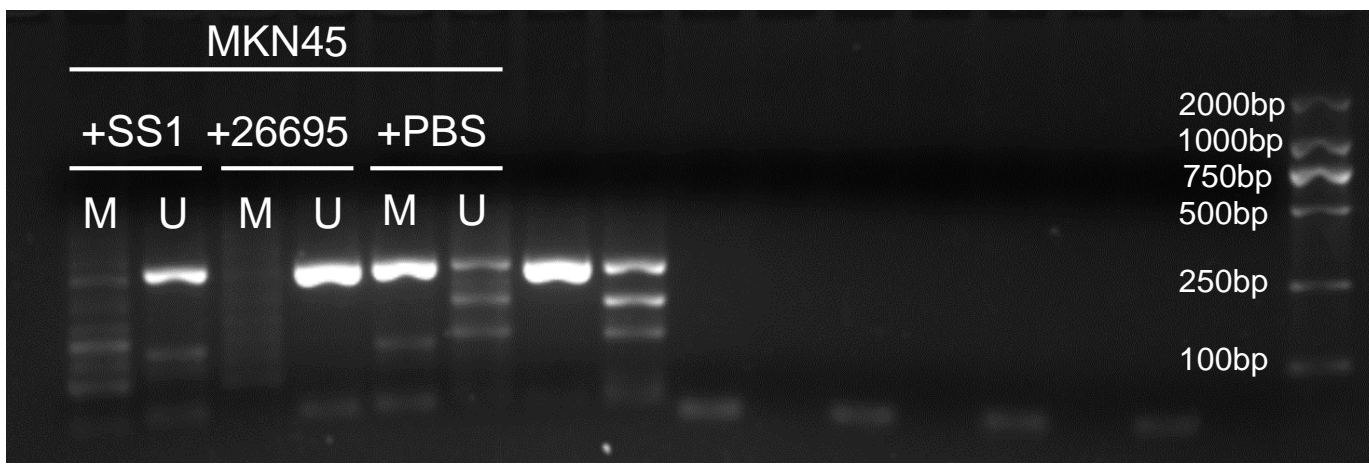

Figure 4E

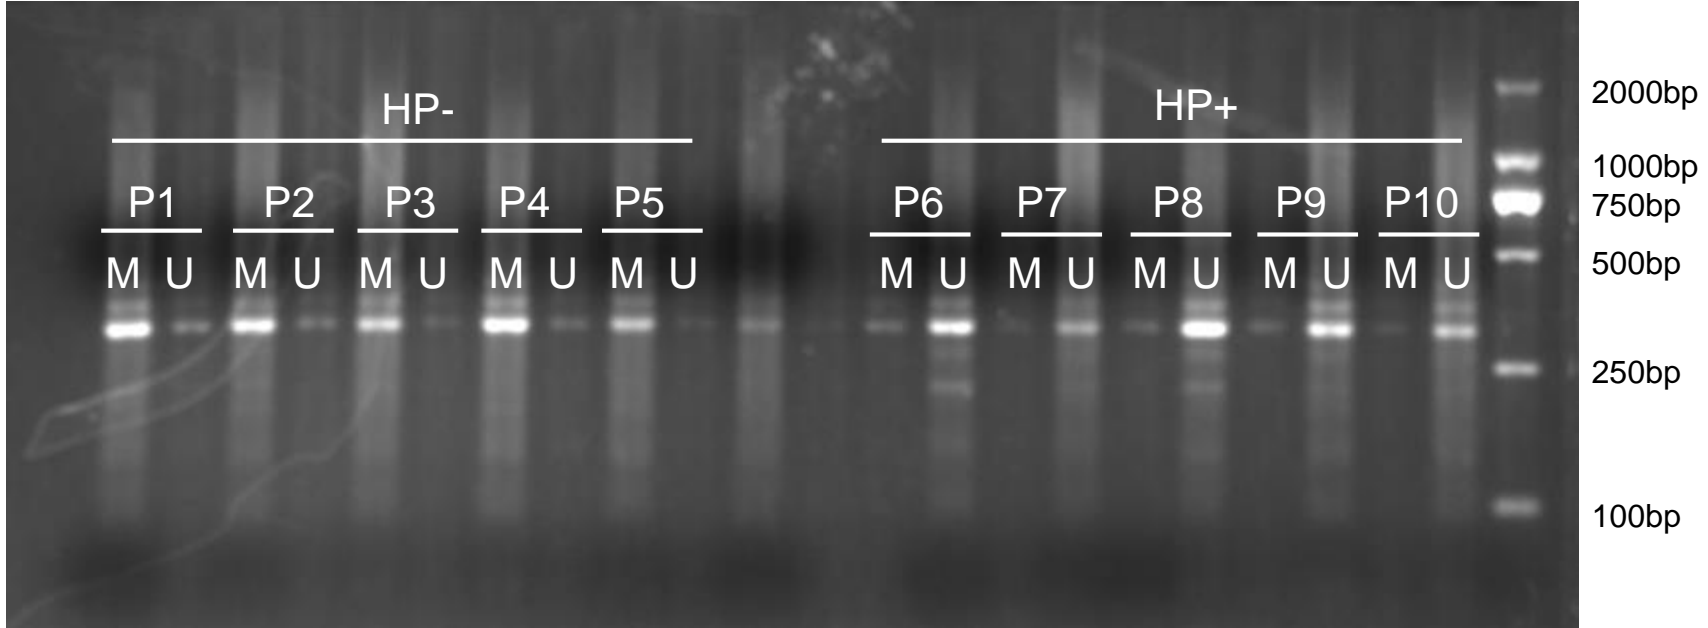

Figure 5E

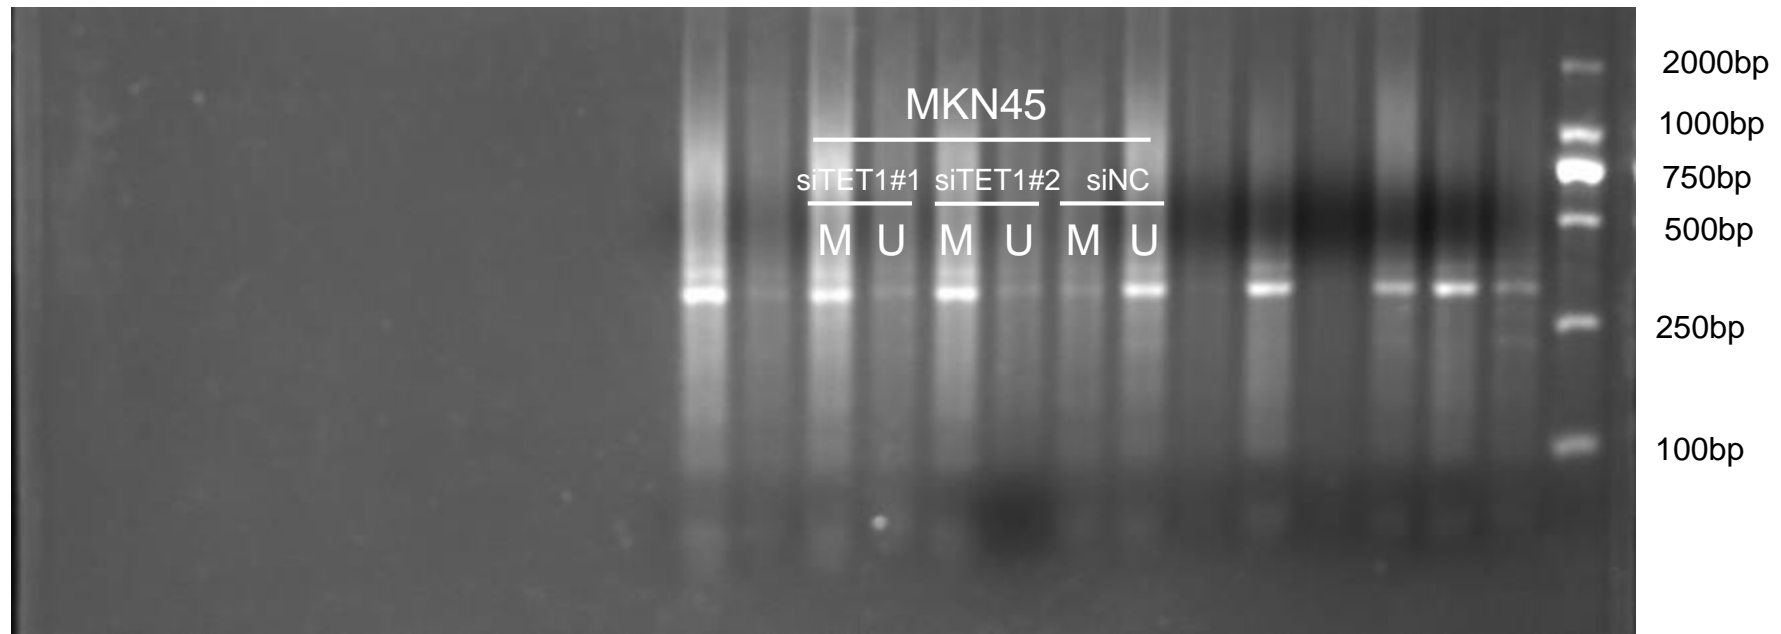

Supplement: MOESM11 [file 25211996]
